# Supplementary material for: Peer-based formative OSCE: impacts on learning and teamwork in medical education
Source: Research Square preprint supplement (doi:10.21203/rs.3.rs-6436931/v1), 2025-07-04
Supplement: Supplementary file 1 [file a82ad1f424daad88f2ab53a1.pdf]

## STUDENT RESEARCH QUESTIONNAIRE – SUMMATIVE OSCE AND FORMATIVE OSCE

### Perception of Medical Students' Learning in Summative and Formative OSCE

Thank you for your interest in participating in this research, which aims to assess the perceptions of 5th- and 6th-year medical students regarding the learning promoted by the Summative and Formative OSCEs.

In this study, your participation will consist of answering a brief questionnaire, where you may express your level of satisfaction according to the following options:

Very satisfied

Partially satisfied

Neither satisfied nor dissatisfied

Partially dissatisfied

Very dissatisfied

Your participation will take approximately 5 minutes, with no associated costs or remuneration.

We appreciate your willingness to contribute to this study!

Informed Consent Form

Yes / No

You are being invited to voluntarily participate in the study entitled \*'"Peer-Based Formative Objective Structured Clinical Examination as a Learning Strategy for Medical Students."\*

This invitation is extended to you as a currently enrolled medical student, making you eligible to contribute to the development of this research.

To decide whether to participate, it is essential to understand your role, potential risks and benefits, and to confirm your agreement through this Informed Consent Form (ICF). If you have any questions, feel free to contact the lead researcher.

Participation is completely voluntary. You may refuse or withdraw at any time without affecting your academic assessment or your relationship with the institution.

The aim of this study is to explore the learning perceptions of students participating in the formative OSCE, an innovative methodology being implemented at a university in the interior of São Paulo that enriches the traditional OSCE format.

The full consent form was sent to your email, with all necessary details. If you agree and wish to participate, please confirm below:

I agree:

( ) Try

( ) No

Student Profile

Age

Date of birth

Date of the evaluation

Biological sex

☐ Male

☐ Female

☐ Prefer not to say

Which medical specialty do you intend to pursue?

What year are you currently enrolled in?

☐ 5th year

☐ 6th year

What is your state of origin?

Perception of Learning – Summative and Formative OSCE

Please indicate your perception for both Summative and Formative OSCEs:

1. The activities carried out during the OSCE contributed to the development of competencies (knowledge, skills, attitudes, and values).

|                 | Very satisfied        | Partially satisfied   | Neither satisfied nor dissatisfied | Partially dissatisfied | Very dissatisfied     |
|-----------------|-----------------------|-----------------------|------------------------------------|------------------------|-----------------------|
| OSCE Assessment | <input type="radio"/> | <input type="radio"/> | <input type="radio"/>              | <input type="radio"/>  | <input type="radio"/> |
| OSCE Training   | <input type="radio"/> | <input type="radio"/> | <input type="radio"/>              | <input type="radio"/>  | <input type="radio"/> |

2. The instructions provided before the activities were clear and sufficient for my preparation.

|                 | Very satisfied        | Partially satisfied   | Neither satisfied nor dissatisfied | Partially dissatisfied | Very dissatisfied     |
|-----------------|-----------------------|-----------------------|------------------------------------|------------------------|-----------------------|
| OSCE Assessment | <input type="radio"/> | <input type="radio"/> | <input type="radio"/>              | <input type="radio"/>  | <input type="radio"/> |
| OSCE Training   | <input type="radio"/> | <input type="radio"/> | <input type="radio"/>              | <input type="radio"/>  | <input type="radio"/> |

3. The time available at the stations was sufficient to complete the tasks safely and effectively.

|                 | Very satisfied        | Partially satisfied   | Neither satisfied nor dissatisfied | Partially dissatisfied | Very dissatisfied     |
|-----------------|-----------------------|-----------------------|------------------------------------|------------------------|-----------------------|
| OSCE Assessment | <input type="radio"/> | <input type="radio"/> | <input type="radio"/>              | <input type="radio"/>  | <input type="radio"/> |
| OSCE Training   | <input type="radio"/> | <input type="radio"/> | <input type="radio"/>              | <input type="radio"/>  | <input type="radio"/> |

4. The human (facilitators, assessors, assistant professors) and material (equipment, simulators, consumables) resources were appropriate for the activities.

|                 | Very satisfied        | Partially satisfied   | Neither satisfied nor dissatisfied | Partially dissatisfied | Very dissatisfied     |
|-----------------|-----------------------|-----------------------|------------------------------------|------------------------|-----------------------|
| OSCE Assessment | <input type="radio"/> | <input type="radio"/> | <input type="radio"/>              | <input type="radio"/>  | <input type="radio"/> |
| OSCE Training   | <input type="radio"/> | <input type="radio"/> | <input type="radio"/>              | <input type="radio"/>  | <input type="radio"/> |

5. The scenarios presented during the OSCE realistically reflected clinical situations encountered during internships.

|                 | Very satisfied        | Partially satisfied   | Neither satisfied nor dissatisfied | Partially dissatisfied | Very dissatisfied     |
|-----------------|-----------------------|-----------------------|------------------------------------|------------------------|-----------------------|
| OSCE Assessment | <input type="radio"/> | <input type="radio"/> | <input type="radio"/>              | <input type="radio"/>  | <input type="radio"/> |
| OSCE Training   | <input type="radio"/> | <input type="radio"/> | <input type="radio"/>              | <input type="radio"/>  | <input type="radio"/> |

6. The proposed exam allowed the practice and enhancement of essential clinical skills for my training.

|                 | Very satisfied        | Partially satisfied   | Neither satisfied nor dissatisfied | Partially dissatisfied | Very dissatisfied     |
|-----------------|-----------------------|-----------------------|------------------------------------|------------------------|-----------------------|
| OSCE Assessment | <input type="radio"/> | <input type="radio"/> | <input type="radio"/>              | <input type="radio"/>  | <input type="radio"/> |
| OSCE Training   | <input type="radio"/> | <input type="radio"/> | <input type="radio"/>              | <input type="radio"/>  | <input type="radio"/> |

7. The scenarios helped develop my clinical reasoning and decision-making skills.

8. The learning objectives established for these activities were clear and achieved by the end of the OSCE.

|                 | Very satisfied        | Partially satisfied   | Neither satisfied nor dissatisfied | Partially dissatisfied | Very dissatisfied     |
|-----------------|-----------------------|-----------------------|------------------------------------|------------------------|-----------------------|
| OSCE Assessment | <input type="radio"/> | <input type="radio"/> | <input type="radio"/>              | <input type="radio"/>  | <input type="radio"/> |
| OSCE Training   | <input type="radio"/> | <input type="radio"/> | <input type="radio"/>              | <input type="radio"/>  | <input type="radio"/> |

9. The feedback received during and after the activities was appropriate and contributed to my learning.

|                 | Very satisfied        | Partially satisfied   | Neither satisfied nor dissatisfied | Partially dissatisfied | Very dissatisfied     |
|-----------------|-----------------------|-----------------------|------------------------------------|------------------------|-----------------------|
| OSCE Assessment | <input type="radio"/> | <input type="radio"/> | <input type="radio"/>              | <input type="radio"/>  | <input type="radio"/> |
| OSCE Training   | <input type="radio"/> | <input type="radio"/> | <input type="radio"/>              | <input type="radio"/>  | <input type="radio"/> |

10. The environment provided by the team was welcoming and facilitated smooth execution of the activities.

|                 | Very satisfied        | Partially satisfied   | Neither satisfied nor dissatisfied | Partially dissatisfied | Very dissatisfied     |
|-----------------|-----------------------|-----------------------|------------------------------------|------------------------|-----------------------|
| OSCE Assessment | <input type="radio"/> | <input type="radio"/> | <input type="radio"/>              | <input type="radio"/>  | <input type="radio"/> |
| OSCE Training   | <input type="radio"/> | <input type="radio"/> | <input type="radio"/>              | <input type="radio"/>  | <input type="radio"/> |

11. The experience gained during the OSCE increased my confidence in handling real clinical situations similar to those encountered during internships.

|                 | Very satisfied        | Partially satisfied   | Neither satisfied nor dissatisfied | Partially dissatisfied | Very dissatisfied     |
|-----------------|-----------------------|-----------------------|------------------------------------|------------------------|-----------------------|
| OSCE Assessment | <input type="radio"/> | <input type="radio"/> | <input type="radio"/>              | <input type="radio"/>  | <input type="radio"/> |
| OSCE Training   | <input type="radio"/> | <input type="radio"/> | <input type="radio"/>              | <input type="radio"/>  | <input type="radio"/> |

12. I believe this experience was important for my development as a future healthcare professional.

|                 | Very satisfied        | Partially satisfied   | Neither satisfied nor dissatisfied | Partially dissatisfied | Very dissatisfied     |
|-----------------|-----------------------|-----------------------|------------------------------------|------------------------|-----------------------|
| OSCE Assessment | <input type="radio"/> | <input type="radio"/> | <input type="radio"/>              | <input type="radio"/>  | <input type="radio"/> |
| OSCE Training   | <input type="radio"/> | <input type="radio"/> | <input type="radio"/>              | <input type="radio"/>  | <input type="radio"/> |

13. The assessments helped improve my ability to apply theoretical knowledge in practical situations.

|                 | Very satisfied        | Partially satisfied   | Neither satisfied nor dissatisfied | Partially dissatisfied | Very dissatisfied     |
|-----------------|-----------------------|-----------------------|------------------------------------|------------------------|-----------------------|
| OSCE Assessment | <input type="radio"/> | <input type="radio"/> | <input type="radio"/>              | <input type="radio"/>  | <input type="radio"/> |
| OSCE Training   | <input type="radio"/> | <input type="radio"/> | <input type="radio"/>              | <input type="radio"/>  | <input type="radio"/> |

14. I feel I was able to adequately demonstrate my clinical skills and critical thinking during the proposed activities.

|                 | Very satisfied        | Partially satisfied   | Neither satisfied nor dissatisfied | Partially dissatisfied | Very dissatisfied     |
|-----------------|-----------------------|-----------------------|------------------------------------|------------------------|-----------------------|
| OSCE Assessment | <input type="radio"/> | <input type="radio"/> | <input type="radio"/>              | <input type="radio"/>  | <input type="radio"/> |
| OSCE Training   | <input type="radio"/> | <input type="radio"/> | <input type="radio"/>              | <input type="radio"/>  | <input type="radio"/> |

15. The OSCE, as an active learning strategy, helped consolidate knowledge that I would hardly have acquired through traditional teaching methods.

|                 | Very satisfied        | Partially satisfied   | Neither satisfied nor dissatisfied | Partially dissatisfied | Very dissatisfied     |
|-----------------|-----------------------|-----------------------|------------------------------------|------------------------|-----------------------|
| OSCE Assessment | <input type="radio"/> | <input type="radio"/> | <input type="radio"/>              | <input type="radio"/>  | <input type="radio"/> |
| OSCE Training   | <input type="radio"/> | <input type="radio"/> | <input type="radio"/>              | <input type="radio"/>  | <input type="radio"/> |

ANSWER ONLY YOUR PERCEPTION OF THE OSCE FORMATIVE - OSCE FORMATIVE RESPONSES

16. Developing the clinical case for the formative OSCE helped deepen my knowledge of the topic and improve my clinical reasoning skills.

- ☐ Very satisfied
- ☐ Partially satisfied
- ☐ Neither satisfied nor dissatisfied
- ☐ Partially dissatisfied
- ☐ Very dissatisfied

17. As a peer assessor during the formative OSCE, I was able to clearly identify and evaluate essential competencies (knowledge, skills, attitudes, and values).

- ☐ Very satisfied
- ☐ Partially satisfied
- ☐ Neither satisfied nor dissatisfied
- ☐ Partially dissatisfied
- ☐ Very dissatisfied

18. The debriefing and discussion process, guided by peer assessors and the facilitator, enhanced my understanding of clinical protocols and guidelines.



- ☐ Very satisfied
- ☐ Partially satisfied
- ☐ Neither satisfied nor dissatisfied
- ☐ Partially dissatisfied
- ☐ Very dissatisfied

19. Participating in the formative OSCE helped increase my confidence in applying theoretical knowledge to real clinical situations.

- ☐ Very satisfied
- ☐ Partially satisfied
- ☐ Neither satisfied nor dissatisfied
- ☐ Partially dissatisfied
- ☐ Very dissatisfied

20. The role-switching between assessor and simulation performer in the formative OSCE was relevant for developing different learning perspectives.

- ☐ Very satisfied
- ☐ Partially satisfied
- ☐ Neither satisfied nor dissatisfied
- ☐ Partially dissatisfied
- ☐ Very dissatisfied

#### Open-ended Questions

21. As a participant in the peer-based formative OSCE, how do you perceive your learning development process?

22. How would you describe your experience in the formative OSCE regarding teamwork?
